# Supplementary material for: Botulinum toxin injection for management of post-haemorrhoidectomy pain: an updated systematic review and meta-analysis of randomised clinical trials
Source: Springer Nature journal article supplement (doi:10.1007/s10151-025-03137-z), 2025-04-07
Supplement: MOESM1 [file 10151_2025_3137_MOESM1_ESM.pdf]

## Supplementary Material

**Title:** Botulinum toxin injection for management of post-haemorrhoidectomy pain: an updated systematic review and meta-analysis of randomised clinical trials

**Journal:** Techniques of Coloproctology

**Authors:** Rakesh Quinn<sup>1</sup> MS, FRACS; Giuleta Jamsari<sup>2</sup> MD, MS; Sinan Albayati<sup>1</sup> MBChB, FRACS

### Affiliations

1. Department of Colorectal Surgery, Nepean Hospital, Kingswood, NSW, Australia
2. Department of Surgery, Westmead Hospital, Westmead, NSW, Australia

### Corresponding author:

Dr Rakesh Quinn

Department of Colorectal Surgery, Nepean Hospital

Address: Derby St, Kingswood NSW 2747, Australia

Email: [rakesh.quinn@health.nsw.gov.au](mailto:rakesh.quinn@health.nsw.gov.au)

ORCID: 0000-0002-6731-6101

| <input type="checkbox"/> | # ▲ | Searches                                       | Results | Type     | Actions                                                | Annotations |
|--------------------------|-----|------------------------------------------------|---------|----------|--------------------------------------------------------|-------------|
| <input type="checkbox"/> | 1   | haemorrhoid surgery.mp.                        | 23      | Advanced | <a href="#">Display Results</a> <a href="#">More</a> ▼ |             |
| <input type="checkbox"/> | 2   | haemorrhoidectomy.mp. or exp Hemorrhoidectomy/ | 1105    | Advanced | <a href="#">Display Results</a> <a href="#">More</a> ▼ |             |
| <input type="checkbox"/> | 3   | exp Hemorrhoids/ or haemorrhoids.mp.           | 6153    | Advanced | <a href="#">Display Results</a> <a href="#">More</a> ▼ |             |
| <input type="checkbox"/> | 4   | 1 or 2 or 3                                    | 6330    | Advanced | <a href="#">Display Results</a> <a href="#">More</a> ▼ |             |
| <input type="checkbox"/> | 5   | Botulinum Toxin.mp. or exp Botulinum Toxins/   | 24428   | Advanced | <a href="#">Display Results</a> <a href="#">More</a> ▼ |             |
| <input type="checkbox"/> | 6   | Botox.mp. or exp Botulinum Toxins, Type A/     | 12447   | Advanced | <a href="#">Display Results</a> <a href="#">More</a> ▼ |             |
| <input type="checkbox"/> | 7   | 5 or 6                                         | 24897   | Advanced | <a href="#">Display Results</a> <a href="#">More</a> ▼ |             |
| <input type="checkbox"/> | 8   | 4 and 7                                        | 27      | Advanced | <a href="#">Display Results</a> <a href="#">More</a> ▼ |             |

**Fig. S1** Search Strategy

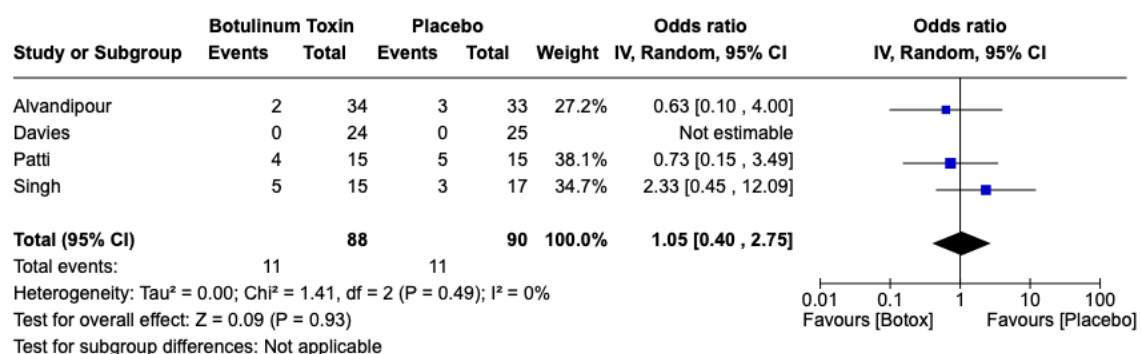

**Fig. S2** Forest plot of faecal incontinence post haemorrhoidectomy

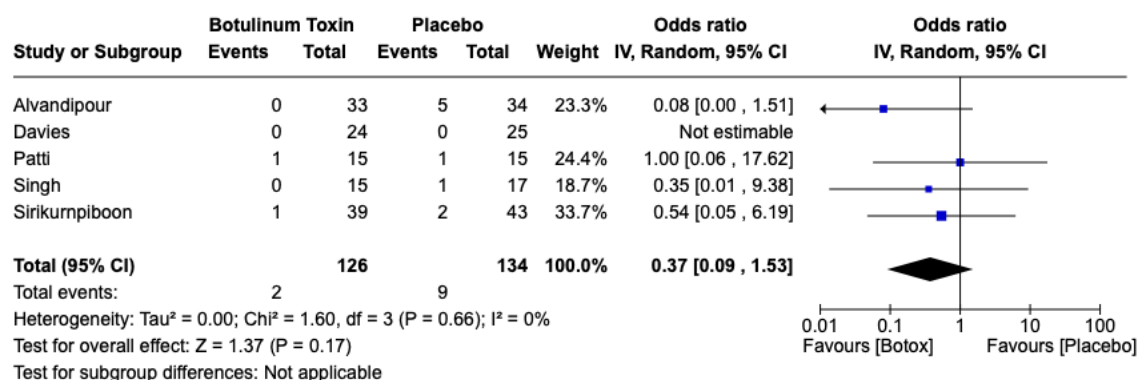

**Fig. S3** Forest plot of urinary retention post haemorrhoidectomy

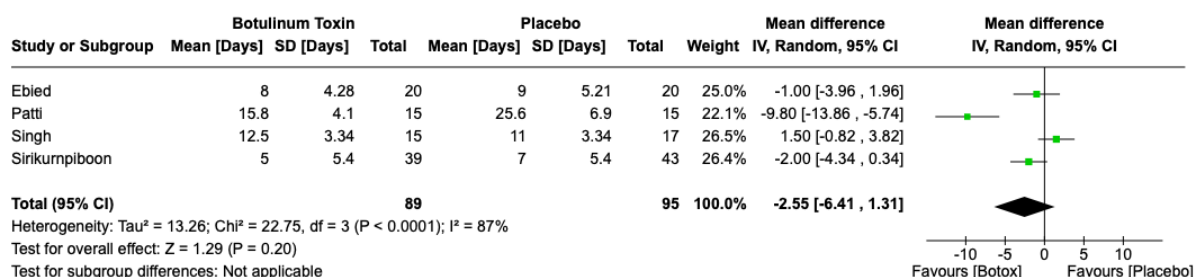

**Fig. S4** Forest plot of days to return to work post haemorrhoidectomy

|       |                              | Risk of bias domains                                   |    |    |    |    |                 |
|-------|------------------------------|--------------------------------------------------------|----|----|----|----|-----------------|
|       |                              | D1                                                     | D2 | D3 | D4 | D5 | Overall         |
| Study | Alvandipour et al. (2021)    | -                                                      | +  | +  | +  | +  | -               |
|       | Davies et al. (2003)         | +                                                      | +  | +  | +  | +  | +               |
|       | Ebied et al. (2022)          | -                                                      | +  | -  | +  | +  | X               |
|       | Notash et al. (2022)         | -                                                      | +  | +  | +  | +  | -               |
|       | Patti et al. (2005)          | -                                                      | +  | +  | +  | +  | -               |
|       | Singh et al. (2009)          | +                                                      | +  | +  | +  | +  | +               |
|       | Sirikurnpiboon et al. (2020) | -                                                      | -  | +  | +  | +  | X               |
|       |                              | Domains:                                               |    |    |    |    | Judgement       |
|       |                              | D1: Bias arising from the randomization process.       |    |    |    |    | ⊗ High          |
|       |                              | D2: Bias due to deviations from intended intervention. |    |    |    |    | - Some concerns |
|       |                              | D3: Bias due to missing outcome data.                  |    |    |    |    | + Low           |
|       |                              | D4: Bias in measurement of the outcome.                |    |    |    |    |                 |
|       |                              | D5: Bias in selection of the reported result.          |    |    |    |    |                 |

**Fig. S5** RoB-2 domain level judgements for each individual study.
